# Supplementary material for: Effects of GS-CA1 on nuclear envelope-associated early HIV-1 infection steps
Source: Frontiers journal article supplement (doi:10.3389/fviro.2025.1547176), 2025-02-03
Supplement: Table_5.xlsx [file Table_5.xlsx]

## Sheet: HIV-1 + GS-CA1 vs CTRL
Accession number_Gene name	Alternate genes	Modulation	Protein name (Uniprot)	Function (Source: UniProt)	Interactions with HIV-1 (source: HIV-1 Interactions Database)		Vpu	Vif	Vpr	Nef	Rev	Tat	gp120	gp41	RT	IN	PR	MA	CA	SP1	NC	SP2	P6	Gag	Gag-Pol	PMID
A0A0C4DGE4 _ STX3		Up	Syntaxin-3	Potentially involved in docking of synaptic vesicles at presynaptic active zones. Apical receptor involved in membrane fusion of apical vesicles. Isoform B: Essential for survival of retinal photoreceetors. Isoform 3: Functions as a regulator of gene expression	-
A0A2U3TZJ5 _ BCL11A		Up	B-cell lymphoma/leukemia 11A	Transcription factor (PubMed:16704730, PubMed:29606353).Associated with the BAF SWI/SNF chromatin remodeling complex (PubMed:23644491).Binds to the 5'-TGACCA-3' sequence motif in regulatory regions of target genes, including a distal promoter of the HBG1 hemoglobin subunit gamma-1 gene (PubMed:29606353).	-
E9PIP3 _ GPSM3		Up	G-protein-signaling modulator 3	Interacts with subunit of G(i) alpha proteins and regulates the activation of G(i) alpha proteins.	-
F5GXG6 _ GTF2H3		Up	General transcription factor IIH subunit 3	Component of the general transcription and DNA repair factor IIH (TFIIH) core complex, which is involved in general and transcription-coupled nucleotide excision repair (NER) of damaged DNA and, when complexed to CAK, in RNA transcription by RNA polymerase II. In NER, TFIIH acts by opening DNA around the lesion to allow the excision of the damaged oligonucleotide and its replacement by a new DNA …	Amino acids 1-48 of HIV-1 Tat, which includes the Tat activation domain, mediate the binding of Tat to CAK and the TFIIH complex through a direct interaction with CDK7 and possibly other TFIIH subunits, including p62 and ERCC3							X														9334327
F5H872 _ MED21		Up	Mediator of RNA polymerase II transcription subunit 21		HIV-1 Tat interacts with the RNA polymerase II holoenzyme, which includes SRB7, during Tat-mediated transactivation of the HIV-1 LTR							X														9121429
G3XAH6 _ PAPOLA		Up	Poly(A) polymerase alpha	Polymerase that creates the 3'-poly(A) tail of mRNA's. Also required for the endoribonucleolytic cleavage reaction at some polyadenylation sites. May acquire specificity through interaction with a cleavage and polyadenylation specificity factor (CPSF) at its C-terminus.	The poly(A) site in the HIV-1 5'-LTR is occluded in a Tat-dependent manner, suggesting a role for Tat in regulating this nucleotide signal, HIV-1 Vpr dephosphorylates poly(A) polymerase (PAP), presumably through inhibition of the p34cdc2/cyclin B kinase complex, leading to enhanced PAP activity				X			X														8491200, 11878934
H0Y8X4 _ DNPH1		Up	2'-deoxynucleoside 5'-phosphate N-hydrolase 1	Catalyzes the cleavage of the N-glycosidic bond of deoxyribonucleoside 5'-monophosphates to yield deoxyribose 5-phosphate and a purine or pyrimidine base. Deoxyribonucleoside 5'-monophosphates containing purine bases are preferred to those containing pyrimidine bases.	-
H0YF06 _ CCDC90B		Up	Coiled-coil domain-containing protein 90B, mitochondrial		-
H0YGQ6 _ RFXANK		Up	DNA-binding protein RFXANK	Activates transcription from class II MHC promoters. Activation requires the activity of the MHC class II transactivator/CIITA. May regulate other genes in the cell. RFX binds the X1 box of MHC-II promoters (PubMed:9806546, PubMed:10072068, PubMed:10725724).May also potentiate the activation of RAF1 (By similarity)	-
H0YN26 _ ANP32A		Up	Acidic leucine-rich nuclear phosphoprotein 32 family member A	(Microbial infection) Plays an essential role in influenza A, B and C viral genome replication (PubMed:32694517, PubMed:33045004, PubMed:33208942, PubMed:30666459).Mechanistically, mediates the assembly of the viral replicase asymmetric dimers composed of PB1, PB2 and PA via its N-terminal region (PubMed:33208942).Also plays an essential role in foamy virus mRNA export from the nucleus (PubMed:21…	The interaction of Rev with ANP32A is decreased by the presence of RRE						X															22174317
J3KPP4 _ LUC7L3		Up	Luc7-like protein 3	Binds cAMP regulatory element DNA sequence. May play a role in RNA splicing.	-
J3QQR8 _ ICAM2		Up	Intercellular adhesion molecule 2	ICAM proteins are ligands for the leukocyte adhesion protein LFA-1 (integrin alpha-L/beta-2). ICAM2 may play a role in lymphocyte recirculation by blocking LFA-1-dependent cell adhesion. It mediates adhesive interactions important for antigen-specific immune response, NK-cell mediated clearance, lymphocyte recirculation, and other cellular interactions important for immune response and surveillan…	Both HIV-1 Nef and Vpu downregulate the cell surface expression of intercellular adhesion molecule 2 (ICAM2, CD102), HIV-1 Vpu is identified to have a physical interaction with intercellular adhesion molecule 2 (ICAM2) in human HEK293 and/or Jurkat cell lines by using affinity tagging and purification mass spectrometry analyses		X			X																22190034, 25275127
K7EPJ5 _ MGRN1		Up	E3 ubiquitin-protein ligase MGRN1	E3 ubiquitin-protein ligase. Mediates monoubiquitination at multiple sites of TSG101 in the presence of UBE2D1, but not of UBE2G1, nor UBE2H. Plays a role in the regulation of endosome-to-lysosome trafficking. Impairs MC1R- and MC4R-signaling by competing with GNAS-binding to MCRs and inhibiting agonist-induced cAMP production. Does not inhibit ADRB2-signaling. Does not promote MC1R ubiquitinatio…	-
M0QYF9 _ HOMER3		Up	Homer protein homolog 3	Postsynaptic density scaffolding protein. Binds and cross-links cytoplasmic regions of GRM1, GRM5, ITPR1, DNM3, RYR1, RYR2, SHANK1 and SHANK3. By physically linking GRM1 and GRM5 with ER-associated ITPR1 receptors, it aids the coupling of surface receptors to intracellular calcium release. Isoforms can be differently regulated and may play an important role in maintaining the plasticity at glutam…	-
M0R165 _ EPS15L1		Up	Epidermal growth factor receptor substrate 15-like 1	Seems to be a constitutive component of clathrin-coated pits that is required for receptor-mediated endocytosis. Involved in endocytosis of integrin beta-1 (ITGB1) and transferrin receptor (TFR); internalization of ITGB1 as DAB2-dependent cargo but not TFR seems to require association with DAB2.	-
O15514 _ POLR2D		Up	DNA-directed RNA polymerase II subunit RPB4	DNA-dependent RNA polymerase catalyzes the transcription of DNA into RNA using the four ribonucleoside triphosphates as substrates. Component of RNA polymerase II which synthesizes mRNA precursors and many functional non-coding RNAs. Pol II is the central component of the basal RNA polymerase II transcription machinery. It is composed of mobile elements that move relative to each other. RPB4 is p…	The transcription factors and kinases c-Jun, JNK, MEK, p38 MAPK, STAT-3, JAK-1, TFII D, TFII F, eIF-4E, and RNA polymerase II are induced by HIV-1 gp120, The interaction of Tip110 with HIV-1 Tat leads to a higher efficiency of elongation for RNAPII complexes formed on the LTR promoter, HIV-1 Vpr interacts with basal transcription complexes such as P-TEFb, TFIIH, TFIID (TBP) and TFIIB which activa…				X			X	X													12775419, 24217245, 10359081
O75164 _ KDM4A		Up	Lysine-specific demethylase 4A	Histone demethylase that specifically demethylates 'Lys-9' and 'Lys-36' residues of histone H3, thereby playing a central role in histone code (PubMed:26741168).Does not demethylate histone H3 'Lys-4', H3 'Lys-27' nor H4 'Lys-20'. Demethylates trimethylated H3 'Lys-9' and H3 'Lys-36' residue, while it has no activity on mono- and dimethylated residues. Demethylation of Lys residue generates forma…	-
O75323 _ GBAS		Up	Protein NipSnap homolog 2	May act as a positive regulator of L-type calcium channels.	-
O75528-2 _ TADA3		Up	Transcriptional adapter 3	Functions as a component of the PCAF complex. The PCAF complex is capable of efficiently acetylating histones in a nucleosomal context. The PCAF complex could be considered as the human version of the yeast SAGA complex. Also known as a coactivator for p53/TP53-dependent transcriptional activation. Component of the ATAC complex, a complex with histone acetyltransferase activity on histones H3 and…	-
O75569-3 _ PRKRA		Up	Interferon-inducible double-stranded RNA-dependent protein kinase activator A	Activates EIF2AK2/PKR in the absence of double-stranded RNA (dsRNA), leading to phosphorylation of EIF2S1/EFI2-alpha and inhibition of translation and induction of apoptosis. Required for siRNA production by DICER1 and for subsequent siRNA-mediated post-transcriptional gene silencing. Does not seem to be required for processing of pre-miRNA to miRNA by DICER1. Promotes UBC9-p53/TP53 association a…	HIV-1 Rev binds TRBP/PACT complex and the binding requires the arginine rich motif (residues 35-50) of HIV-1 Rev, HIV-1 Tat binds TRBP/PACT complex and the binding requires the arginine rich motif (residues 48-58) of HIV-1 Tat						X	X														24025624, 24025624
O94864 _ SUPT7L		Up	STAGA complex 65 subunit gamma		-
O94913 _ PCF11		Up	Pre-mRNA cleavage complex 2 protein Pcf11	Component of pre-mRNA cleavage complex II.	-
P00395 _ MT-CO1		Up	Cytochrome c oxidase subunit 1	Component of the cytochrome c oxidase, the last enzyme in the mitochondrial electron transport chain which drives oxidative phosphorylation.	Tat-induced mitochondrial membrane permeabilization is associated with inhibition of cytochrome c oxidase (COX) activity by Tat in disrupted mitochondria from human samples							X														22419111
P08567 _ PLEK		Up	Pleckstrin	Major protein kinase C substrate of platelets.	-
P14174 _ MIF		Up	Macrophage migration inhibitory factor	Pro-inflammatory cytokine involved in the innate immune response to bacterial pathogens (PubMed:15908412, PubMed:17443469, PubMed:23776208).The expression of MIF at sites of inflammation suggests a role as mediator in regulating the function of macrophages in host defense (PubMed:15908412, PubMed:17443469, PubMed:23776208).Counteracts the anti-inflammatory activity of glucocorticoids (PubMed:1590…	HIV-1 Nef specifically incorporates CSF2, PPBP (NAP2), CCL5, TNF, FAS, CXCL1, IL12B, MIF and OSM into plasma extracellular vesicles from HIV-1 infected patient samples, HIV-1 Tat upregulates the expression of macrophage migration inhibitory factor gene (glycosylation-inhibiting factor, MIF) in mammary epithelial cells, Treatment of human primary astrocytes with HIV-1 Vpr upregulates secretion of …		X		X	X		X														27211553, 15857508, 23728617, 24551192
P20290-2 _ BTF3		Up	Transcription factor BTF3	When associated with NACA, prevents inappropriate targeting of non-secretory polypeptides to the endoplasmic reticulum (ER). Binds to nascent polypeptide chains as they emerge from the ribosome and blocks their interaction with the signal recognition particle (SRP), which normally targets nascent secretory peptides to the ER. BTF3 is also a general transcription factor that can form a stable comp…	Using acetylated HIV-1 IN as bait in yeast two-hybrid screening identifies transcription regulatory and chromatin remodeling factors LEDGF/p75, KAP1, BTF3b, THRAP3, and HMGN2 as IN-binding partners											X										19460752
P28072 _ PSMB6		Up	Proteasome subunit beta type-6	Component of the 20S core proteasome complex involved in the proteolytic degradation of most intracellular proteins. This complex plays numerous essential roles within the cell by associating with different regulatory particles. Associated with two 19S regulatory particles, forms the 26S proteasome and thus participates in the ATP-dependent degradation of ubiquitinated proteins. The 26S proteasom…	HIV-1 gp120 and gp160 is identified to have a physical interaction with proteasome subunit, beta type, 6 (PSMB6) in human HEK293 and/or Jurkat cell lines by using affinity tagging and purification mass spectrometry analyses, HIV-1 Tat slightly enhances the activity of the purified 26 S proteasome. HIV-1 Vif binds to the cellular cytidine deaminase APOBEC3G and targets it for degradation through a…			X				X	X (ALSO INTERACT WITH GP160 PTRCURSOR)			X										22190034, 22190034, 12419264, 14614829, 10893419
P30419-2 _ NMT1		Up	Glycylpeptide N-tetradecanoyltransferase 1	Adds a myristoyl group to the N-terminal glycine residue of certain cellular and viral proteins (PubMed:22865860, PubMed:25255805, PubMed:9353336, PubMed:9506952)	HIV-1 Nef is identified to have a physical interaction with N-myristoyltransferase 1 (NMT1) in human HEK293 and/or Jurkat cell lines by using affinity tagging and purification mass spectrometry analyses, NMR studies of membrane binding-defective V7R and L8A HIV-1 Matrix mutants reveal minor structural changes that appear to be responsible for stabilizing the myristate-sequestered (myr(s)) species…					X								X								22190034, 17188710
P32019-3 _ INPP5B		Up	Type II inositol 1,4,5-trisphosphate 5-phosphatase	Hydrolyzes phosphatidylinositol 4,5-bisphosphate (PtIns(4,5)P2) and the signaling molecule phosphatidylinositol 1,4,5-trisphosphate (PtIns(1,4,5)P3), and thereby modulates cellular signaling events.	-
P40306 _ PSMB10		Up	Proteasome subunit beta type-10	The proteasome is a multicatalytic proteinase complex which is characterized by its ability to cleave peptides with Arg, Phe, Tyr, Leu, and Glu adjacent to the leaving group at neutral or slightly basic pH. The proteasome has an ATP-dependent proteolytic activity. This subunit is involved in antigen processing to generate class I binding peptides.	HIV-1 Tat upregulates LMP7 and MECL1 catalytic subunits of the proteasome resulting in a more efficient generation and presentation of subdominant MHC-I-binding CTL epitopes of heterologous Ags, HIV-1 Vif binds to the cellular cytidine deaminase APOBEC3G and targets it for degradation through an interaction with the proteasome, thereby inhibiting APOBEC3G mediated restriction of HIV-1 replication…			X				X				X			X							15356131, 19403671, 10893419
P51608 _ MECP2		Up	Methyl-CpG-binding protein 2	Chromosomal protein that binds to methylated DNA. It can bind specifically to a single methyl-CpG pair. It is not influenced by sequences flanking the methyl-CpGs. Mediates transcriptional repression through interaction with histone deacetylase and the corepressor SIN3A. Binds both 5-methylcytosine (5mC) and 5-hydroxymethylcytosine (5hmC)-containing DNA, with a preference for 5-methylcytosine (5m…	MECP2 mRNA is selectively retained in HIV-1 Nef-expressing cellular exosomes, and eight miRNAs (miR-19a, miR-29b, miR-34a*, miR-146b, miR-181a, miR181c, miR-195, and let-7c) which target MECP2 mRNA are selectively secreted in exosomes from these cells					X																25961023
P61221 _ ABCE1		Up	ATP-binding cassette sub-family E member 1	(Microbial infection) May act as a chaperone for post-translational events during HIV-1 capsid assembly. (Microbial infection) Plays a role in the down-regulation of the 2-5A/RNASEL pathway during encephalomyocarditis virus (EMCV) and HIV-1 infections.	The nucleocapsid (NC) domain of Gag is critical for interaction with endogenous ABCE1 in primate cells; basic residues in NC are critical for the Gag-ABCE1 interaction, while the cysteine and histidine residues in the zinc fingers are dispensable, HuHP68 is essential for HIV-1 capsid assembly and associates with HIV-1 Vif in the form of an HuHP68 complex with HIV-1 Gag			X																X		23008114, 12600646
P61289 _ PSME3		Up	Proteasome activator complex subunit 3	Subunit of the 11S REG-gamma (also called PA28-gamma) proteasome regulator, a doughnut-shaped homoheptamer which associates with the proteasome. 11S REG-gamma activates the trypsin-like catalytic subunit of the proteasome but inhibits the chymotrypsin-like and postglutamyl-preferring (PGPH) subunits. Facilitates the MDM2-p53/TP53 interaction which promotes ubiquitination- and MDM2-dependent prote…	HIV-1 Tat slightly enhances the activity of the purified 26 S proteasome, HIV-1 Vif is identified to have a physical interaction with proteasome activator subunit 3 (PSME3; PA28gamma) in human HEK293 and/or Jurkat cell lines by using affinity tagging and purification mass spectrometry analyses, Proteasomal degradation of HIV-1 integrase in mammalian cells occurs by the N-end rule pathway			X				X				X										14550573, 22190034, 10893419
P68036 _ UBE2L3		Up	Ubiquitin-conjugating enzyme E2 L3	Ubiquitin-conjugating enzyme E2 that specifically acts with HECT-type and RBR family E3 ubiquitin-protein ligases. Does not function with most RING-containing E3 ubiquitin-protein ligases because it lacks intrinsic E3-independent reactivity with lysine: in contrast, it has activity with the RBR family E3 enzymes, such as PRKN and ARIH1, that function like RING-HECT hybrids. Accepts ubiquitin from…	In the presence of Nef, lipid raft Cdc42 is activated and forms a ternary complex between the c-Cbl-interacting protein p85Cool-1/betaPix and c-Cbl, displacing UbcH7 from rafts					X																16356860
Q00577 _ PURA		Up	Transcriptional activator protein Pur-alpha	This is a probable transcription activator that specifically binds the purine-rich single strand of the PUR element located upstream of the MYC gene. May play a role in the initiation of DNA replication and in recombination.	The interaction of Puralpha with HIV-1 RRE RNA occurs in the cytoplasm and enhances the association of HIV-1 Rev with the RRE, HIV-1 Tat proteins from different clades modulate differently Pur-alpha and SMAD4 to bind the JCV non-coding control region and affect differently on SMAD4 localization to the nucleus						X	X														17722108, 19182532
Q01658 _ DR1		Up	Protein Dr1	The association of the DR1/DRAP1 heterodimer with TBP results in a functional repression of both activated and basal transcription of class II genes. This interaction precludes the formation of a transcription-competent complex by inhibiting the association of TFIIA and/or TFIIB with TBP. Can bind to DNA on its own. Component of the ATAC complex, a complex with histone acetyltransferase activity …	Interaction of HIV-1 Tat with TBP/TFIID competes with negative cofactor Dr1 interaction with TBP, thereby inhibiting Dr1							X														8764062
Q04446 _ GBE1		Up	1,4-alpha-glucan-branching enzyme	Required for normal glycogen accumulation (PubMed:8463281, PubMed:26199317, PubMed:8613547).The alpha 1-6 branches of glycogen play an important role in increasing the solubility of the molecule (Probable)	-
Q08AG7 _ MZT1		Up	Mitotic-spindle organizing protein 1	Required for gamma-tubulin complex recruitment to the centrosome.	-
Q12800-2 _ TFCP2		Up	Alpha-globin transcription factor CP2	Binds a variety of cellular and viral promoters including fibrinogen, alpha-globin, SV40 and HIV-1 promoters. Activation of the alpha-globin promoter in erythroid cells is via synergistic interaction with UBP1 (By similarity).Functions as part of the SSP (stage selector protein) complex. Facilitates the interaction of the gamma-globin genes with enhancer elements contained in the locus control re…	-
Q14444-2 _ CAPRIN1		Up	Caprin-1	mRNA-binding protein that acts as a regulator of mRNAs transport, translation and/or stability, and which is involved in synaptic plasticity in neurons and cell proliferation and migration in multiple cell types (PubMed:17210633, PubMed:31439799).	Tandem affinity purification and mass spectrometry analysis identify cell cycle associated protein 1 (CAPRIN1), HIV-1 Gag, Gag/Pol, gp120, and Nef incorporated into staufen1 RNP complexes isolated from HIV-1-expressing cells. HIV-1 Rev interacting protein, cell cycle associated protein 1 (CAPRIN1), is identified by the in-vitro binding experiments involving cytosolic or nuclear extracts from HeLa…					X	X		X											X	X	23125841, 22174317
Q15428 _ SF3A2		Up	Splicing factor 3A subunit 2	Involved in pre-mRNA splicing as a component of the splicing factor SF3A complex that contributes to the assembly of the 17S U2 snRNP, and the subsequent assembly of the pre-spliceosome 'E' complex and the pre-catalytic spliceosome 'A' complex (PubMed:10882114, PubMed:11533230).Involved in pre-mRNA splicing as a component of pre-catalytic spliceosome 'B' complexes, including the Bact complex (Pub…	HIV-1 Rev interacting protein, splicing factor 3a, subunit 2 (SF3A2), is identified by the in-vitro binding experiments involving cytosolic or nuclear extracts from HeLa cells. The interaction of Rev with SF3A2 is increased by RRE						X															22174317
Q15910 _ EZH2		Up	Histone-lysine N-methyltransferase EZH2	Polycomb group (PcG) protein. Catalytic subunit of the PRC2/EED-EZH2 complex, which methylates 'Lys-9' (H3K9me) and 'Lys-27' (H3K27me) of histone H3, leading to transcriptional repression of the affected target gene. Able to mono-, di- and trimethylate 'Lys-27' of histone H3 to form H3K27me1, H3K27me2 and H3K27me3, respectively. Displays a preference for substrates with less methylation, loses ac…	HIV-1 Tat induces EZH2 phophorylation in an Akt1 dependent manner							X														26632198
Q5JSL0 _ HMGN5		Up	High mobility group nucleosome-binding domain-containing protein	Preferentially binds to euchromatin and modulates cellular transcription by counteracting linker histone-mediated chromatin compaction.	-
Q5SGD2-2 _ PPM1L		Up	Protein phosphatase 1L	Acts as a suppressor of the SAPK signaling pathways by associating with and dephosphorylating MAP3K7/TAK1 and MAP3K5, and by attenuating the association between MAP3K7/TAK1 and MAP2K4 or MAP2K6.	-
Q5T123 _ SH3BGRL3		Up	SH3 domain-binding glutamic acid-rich-like protein 3	Could act as a modulator of glutaredoxin biological activity (Probable). May play a role in cytoskeleton organization (PubMed:34380438).	-
Q5TDF0 _ NTPCR		Up	Cancer-related nucleoside-triphosphatase	Has nucleotide phosphatase activity towards ATP, GTP, CTP, TTP and UTP. Hydrolyzes nucleoside diphosphates with lower efficiency.	-
Q7L2Z9 _ CENPQ		Up	Centromere protein Q	Component of the CENPA-CAD (nucleosome distal) complex, a complex recruited to centromeres which is involved in assembly of kinetochore proteins, mitotic progression and chromosome segregation. May be involved in incorporation of newly synthesized CENPA into centromeres via its interaction with the CENPA-NAC complex (PubMed:16622420).	-
Q8IU81 _ IRF2BP1		Up	Interferon regulatory factor 2-binding protein 1	Acts as a transcriptional corepressor in a IRF2-dependent manner; this repression is not mediated by histone deacetylase activities. May act as an E3 ligase towards JDP2, enhancing its polyubiquitination. Represses ATF2-dependent transcriptional activation.	-
Q8N3X1 _ FNBP4		Up	Formin-binding protein 4	-	-
Q8NI22 _ MCFD2		Up	Multiple coagulation factor deficiency protein 2	The MCFD2-LMAN1 complex forms a specific cargo receptor for the ER-to-Golgi transport of selected proteins. Plays a role in the secretion of coagulation factors.	-
Q8WUY8 _ NAT14		Up	Probable N-acetyltransferase 14	May act as a transcription factor that regulates the expression of coproporphyrinogen oxidase by binding to a promoter regulatory element.	-
Q92947-2 _ GCDH		Up	Glutaryl-CoA dehydrogenase, mitochondrial	Catalyzes the oxidative decarboxylation of glutaryl-CoA to crotonyl-CoA and CO2 in the degradative pathway of L-lysine, L-hydroxylysine, and L-tryptophan metabolism. It uses electron transfer flavoprotein as its electron acceptor. Isoform Short is inactive.	-
Q92982 _ NINJ1		Up	Ninjurin-1	Involved in leukocyte migration during inflammation by promoting transendothelial migration of macrophages via homotypic binding (By similarity).Promotes the migration of monocytes across the brain endothelium to central nervous system inflammatory lesions (PubMed:22162058).Acts as a regulator of Toll-like receptor 4 (TLR4) signaling triggered by lipopolysaccharide (LPS) during systemic inflammat…	-
Q96AJ9-1 _ VTI1A		Up	Vesicle transport through interaction with t-SNAREs homolog 1A	V-SNARE that mediates vesicle transport pathways through interactions with t-SNAREs on the target membrane. These interactions are proposed to mediate aspects of the specificity of vesicle trafficking and to promote fusion of the lipid bilayers. Involved in vesicular transport from the late endosomes to the trans-Golgi network. Along with VAMP7, involved in an non-conventional RAB1-dependent traf…	HIV-1 gp41 is identified to have a physical interaction with vesicle transport through interaction with t-SNAREs homolog 1A (VTI1A) in human HEK293 and/or Jurkat cell lines by using affinity tagging and purification mass spectrometry analyses									X												22190034
Q96H20 _ SNF8		Up	Vacuolar-sorting protein SNF8	Component of the endosomal sorting complex required for transport II (ESCRT-II), which is required for multivesicular body (MVB) formation and sorting of endosomal cargo proteins into MVBs. The MVB pathway mediates delivery of transmembrane proteins into the lumen of the lysosome for degradation. The ESCRT-II complex is probably involved in the recruitment of the ESCRT-III complex. The ESCRT-II c…	Depletion of EAP30 by siRNA leads to a block to HIV-1 genomic RNA trafficking, resulting in the accumulation of genomic RNA in the nucleus and juxtanuclear domains and reduced viral structural protein Gag and virus production levels, Knockdown of SNF8 (ESCRT-II component) decreases extracellular HIV-1 CA-p24 levels when using VSV-pseudotyped virus														X					X		23305486, 26268989
Q96K17 _ BTF3L4		Up	Transcription factor BTF3 homolog 4	-	-
Q9BTT4 _ MED10		Up	Mediator of RNA polymerase II transcription subunit 10	Component of the Mediator complex, a coactivator involved in the regulated transcription of nearly all RNA polymerase II-dependent genes. Mediator functions as a bridge to convey information from gene-specific regulatory proteins to the basal RNA polymerase II transcription machinery. Mediator is recruited to promoters by direct interactions with regulatory proteins and serves as a scaffold for t…	-
Q9BVC5 _ C2orf49		Up	Ashwin	-	HIV-1 Rev interacting protein, chromosome 2 open reading frame 49, is identified by the in-vitro binding experiments involving cytosolic or nuclear extracts from HeLa cells. Positional proteomics analysis identifies the cleavage of human chromosome 2 open reading frame 49 (C2orf49; Ashwin) at amino acid residues 29-30 by the HIV-1 protease						X						X									22174317, 22944692
Q9H0X4 _ ITFG3		Up	Protein FAM234A	-	-
Q9H2Z4 _ NKX2-4	NKX2-1	Up	Homeobox protein Nkx-2.4	Probable transcription factor.	-
Q9H7M9 _ C10orf54		Up	V-type immunoglobulin domain-containing suppressor of T-cell activation	Immunoregulatory receptor which inhibits the T-cell response (PubMed:24691993). May promote differentiation of embryonic stem cells, by inhibiting BMP4 signaling (By similarity).May stimulate MMP14-mediated MMP2 activation (PubMed:20666777)	-
Q9H9L3 _ ISG20L2		Up	Interferon-stimulated 20 kDa exonuclease-like 2	3'-> 5'-exoribonuclease involved in ribosome biogenesis in the processing of the 12S pre-rRNA. Displays a strong specificity for a 3'-end containing a free hydroxyl group.	-
Q9NP66 _ HMG20A		Up	High mobility group protein 20A	Plays a role in neuronal differentiation as chromatin-associated protein. Acts as inhibitor of HMG20B. Overcomes the repressive effects of the neuronal silencer REST and induces the activation of neuronal-specific genes. Involved in the recruitment of the histone methyltransferase KMT2A/MLL1 and consequent increased methylation of histone H3 lysine 4	-
Q9NRR5 _ UBQLN4		Up	Ubiquilin-4	Key regulator of DNA repair that represses homologous recombination repair: in response to DNA damage, recruited to sites of DNA damage following phosphorylation by ATM and acts by binding and removing ubiquitinated MRE11 from damaged chromatin, leading to MRE11 degradation by the proteasome. Collaborates with DESI1/POST in the export of ubiquitinated proteins from the nucleus to the cytoplasm (P…	-
Q9NS93 _ TM7SF3		Up	Transmembrane 7 superfamily member 3	Involved in the inhibition of cytokine-induced death of pancreatic beta cells. Involved in the promotion of insulin secretion from pancreatic beta cells	-
Q9NXX6 _ NSMCE4A		Up	Non-structural maintenance of chromosomes element 4 homolog A	Component of the SMC5-SMC6 complex, a complex involved in DNA double-strand breaks by homologous recombination. The complex may promote sister chromatid homologous recombination by recruiting the SMC1-SMC3 cohesin complex to double-strand breaks. The complex is required for telomere maintenance via recombination in ALT (alternative lengthening of telomeres) cell lines and mediates sumoylation of …	-
Q9NYB0 _ TERF2IP		Up	Telomeric repeat-binding factor 2-interacting protein 1	it is required to negatively regulate telomere recombination and is essential for repressing homology-directed repair (HDR), which can affect telomere length. Does not bind DNA directly: recruited to telomeric double-stranded 5'-TTAGGG-3' repeats via its interaction with TERF2. Independently of its function in telomeres, also acts as a transcription regulator: recruited to extratelomeric 5'-TTAGG…	-
Q9P016 _ THYN1		Up	Thymocyte nuclear protein 1	Specifically binds 5-hydroxymethylcytosine (5hmC), suggesting that it acts as a specific reader of 5hmC.	-
Q9UBT2 _ UBA2		Up	SUMO-activating enzyme subunit 2	The heterodimer acts as an E1 ligase for SUMO1, SUMO2, SUMO3, and probably SUMO4. It mediates ATP-dependent activation of SUMO proteins followed by formation of a thioester bond between a SUMO protein and a conserved active site cysteine residue on UBA2/SAE2.	-
Q9UKU6 _ TRHDE		Up	Thyrotropin-releasing hormone-degrading ectoenzyme	Specific inactivation of TRH after its release.	-
Q9Y6K0 _ CEPT1		Up	Choline/ethanolaminephosphotransferase 1	Catalyzes both phosphatidylcholine and phosphatidylethanolamine biosynthesis from CDP-choline and CDP-ethanolamine, respectively. Involved in protein-dependent process of phospholipid transport to distribute phosphatidyl choline to the lumenal surface. Has a higher cholinephosphotransferase activity than ethanolaminephosphotransferase activity.		Analysis of HIV-1 proviral integration sites in antiretroviral treatment patients indicates that CEPT1 gene favors HIV-1 integration for expansion and persistence of infected cells, suggesting HIV-1 IN interacts with CEPT1										X										24968937
O75319 _ DUSP11		Down	RNA/RNP complex-1-interacting phosphatase	Possesses RNA 5'-triphosphatase and diphosphatase activities, but displays a poor protein-tyrosine phosphatase activity. In addition, has phosphatase activity with ATP, ADP and O-methylfluorescein phosphate (in vitro). Binds to RNA. May participate in nuclear mRNA metabolism.	-
P61626 _ LYZ		Down	Lysozyme C	Lysozymes have primarily a bacteriolytic function; those in tissues and body fluids are associated with the monocyte-macrophage system and enhance the activity of immunoagents.	Tandem affinity purification and mass spectrometry analysis identify lysozyme (LYZ), HIV-1 Gag, Gag/Pol, gp120, and Nef incorporated into staufen1 RNP complexes isolated from HIV-1-expressing cells. HIV-1 Tat downregulates the expression of lysozyme (LYZ) in human primary T cells.					X		X	X											X	X	23125841, 23898208
P84103 _ SRSF3		Down	Serine/arginine-rich splicing factor 3	Also functions as export adapter involved in mRNA nuclear export (PubMed:11336712, PubMed:18364396, PubMed:28984244).Binds mRNA which is thought to be transferred to the NXF1-NXT1 heterodimer for export (TAP/NXF1 pathway); enhances NXF1-NXT1 RNA-binding activity (PubMed:11336712, PubMed:18364396).	SRSF3 (serine/arginine-rich splicing factor 3) inhibits HIV-1 Tat-mediated transactivation activity in HEK293 cells							X														25416801
Q15928 _ ZNF141	ZNF732;ZNF679;ZNF735;ZNF519;ZNF479;ZNF595;ZNF257;ZNF66;ZNF718;ZNF716;ZNF486;ZNF506;ZNF729	Down	Zinc finger protein 141	May be involved in transcriptional regulation as a repressor. Plays a role in limb development.	-
Q56NI9 _ ESCO2		Down	N-acetyltransferase ESCO2	Acetyltransferase required for the establishment of sister chromatid cohesion (PubMed:15821733, PubMed:15958495).	-
Q6P4F7 _ ARHGAP11A		Down	Rho GTPase-activating protein 11A	GTPase activator for the Rho-type GTPases by converting them to an inactive GDP-bound state.	-
Q6PGP7 _ TTC37		Down	SKI3 subunit of superkiller complex protein, SKI3 homolog, Ski3, Tetratricopeptide repeat protein 37, TPR repeat protein 37, Tricho-hepatic-enteric syndrome protein, Thespin	Component of the SKI complex which is thought to be involved in exosome-mediated RNA decay and associates with transcriptionally active genes in a manner dependent on PAF1 complex (PAF1C).	-
Q6ZN06 _ ZNF813	ZNF525;ZNF765;ZNF468;ZNF28	Down	Zinc finger protein 813	May be involved in transcriptional regulation.	-
Q8IYB8 _ SUPV3L1		Down	ATP-dependent RNA helicase SUPV3L1, mitochondrial	Major helicase player in mitochondrial RNA metabolism. Component of the mitochondrial degradosome (mtEXO) complex, that degrades 3' overhang double-stranded RNA with a 3'-to-5' directionality in an ATP-dependent manner. Involved in the degradation of non-coding mitochondrial transcripts (MT-ncRNA) and tRNA-like molecules	-
Q8TED0 _ UTP15		Down	U3 small nucleolar RNA-associated protein 15 homolog	Ribosome biogenesis factor. Involved in nucleolar processing of pre-18S ribosomal RNA. Required for optimal pre-ribosomal RNA transcription by RNA polymerase I. Part of the small subunit (SSU) processome, first precursor of the small eukaryotic ribosomal subunit. During the assembly of the SSU processome in the nucleolus, many ribosome biogenesis factors, an RNA chaperone and ribosomal proteins a…	Expression of HIV-1 Tat downregulates the abundance of UTP15, U3 small nucleolar ribonucleoprotein (UTP15) in the nucleoli of Jurkat T-cells							X														23166591
Q92771 _ DDX12P		Down	Putative ATP-dependent RNA helicase DDX12	DNA helicase involved in cellular proliferation. Probably required for maintaining the chromosome segregation (By similarity)	-
Q9BRX9 _ WDR83		Down	WD repeat domain-containing protein 83	Molecular scaffold protein for various multimeric protein complexes. Acts as a module in the assembly of a multicomponent scaffold for the ERK pathway, linking ERK responses to specific agonists. At low concentrations it enhances ERK activation, whereas high concentrations lead to the inhibition of ERK activation. Also involved in response to hypoxia by acting as a negative regulator of HIF1A/HIF…	-
Q9HCG1 _ ZNF160		Down	Zinc finger protein 160	May be involved in transcriptional regulation.	-

## Sheet: HIV-1 + GS-CA1 vs HIV-1
no modulation

## Sheet: HIV-1 + GS-CA1 vs GS-CA1
Accession number_Gene name	Alternate genes	Modulation	Protein name (Uniprot)	Function (Source: UniProt)	Interactions with HIV-1 (source: HIV-1 Interactions Database)		Vpu	Vif	Vpr	Nef	Rev	Tat	gp120	gp41	RT	IN	PR	MA	CA	SP1	NC	SP2	P6	Gag	Gag-Pol	PMID
A0A087WYR3 _ TPD52L2		Up	TPD52 like 2		-																					-
A0A2U3TZN1 _ SRP19		Up	Signal recognition particle 19 kDa protein	signal recognition particle, endoplasmic reticulum targeting, 7S RNA binding	Overexpression of SRP19 reduces the HIV-1 NC-mediated packaging of 7SL RNA and A3G into virions in a dose-dependent manner																X					PMID: 17881443
G3XAN8 _ TIMM8B		Up	Mitochondrial import inner membrane translocase subunit	Mitochondrial intermembrane chaperone that participates in the import and insertion of some multi-pass transmembrane proteins into the mitochondrial inner membrane. Also required for the transfer of beta-barrel precursors from the TOM complex to the sorting and assembly machinery (SAM complex) of the outer membrane. Acts as a chaperone-like protein that protects the hydrophobic precursors from ag…	HIV-1 gp41 is identified to have a physical interaction with translocase of inner mitochondrial membrane 8 homolog B (TIMM8B) in human HEK293 and/or Jurkat cell lines by using affinity tagging and purification mass spectrometry analyses									x												PMID: 22190034
B1AUU8 _ EPS15		Up	Epidermal growth factor receptor substrate 15	calcium ion binding	Genome-wide shRNA screening identifies EPS15, which is required for HIV-1 Nef-induced downregulation of CD4 in HeLa CD4+ cell. Inhibition of endocytosis by siRNA-mediated depletion of EPS15, STX7, RAB7, and VAMP7 restores Gag/p24 expression in the presence of APOL1. Inhibition of endocytosis by siRNA-mediated depletion of EPS15, STX7, RAB7, and VAMP7 restores Gag/p24 expression in the presence of…					x									x					x		PMID: 25496667 PMID: 24173214 PMID: 24173214
P17676-3 _ CEBPB		Up	CCAAT/enhancer-binding protein beta	Important transcription factor regulating the expression of genes involved in immune and inflammatory responses (PubMed:1741402), Essential for gene expression induction in activated macrophages. Plays a major role in immune responses such as CD4+ T-cell response, granuloma formation and endotoxin shock. Not essential for intracellular bacteria killing.	The gene expression of CCAAT/enhancer binding protein beta is significantly upregulated in both clade B and clade C Tat treated SK-N-MC cells. NF-IL6 facilitates the reverse transcription of HIV-1 by binding to and inhibiting the antiviral cytidine deaminase APOBEC3G. A mutation in NF-IL6 at Ser-288 weakens its binding to APOBEC3G and strongly inhibits HIV-1 replication. HIV-1 Vpr-induced retrotr…			x	x			x	x													PMID: 23915234 PMID: 18809921 PMID: 25613138
P19634 _ SLC9A1		Up	Sodium/hydrogen exchanger 1	Involved in pH regulation to eliminate acids generated by active metabolism or to counter adverse environmental conditions. Major proton extruding system driven by the inward sodium ion chemical gradient. Plays an important role in signal transduction.	EIPA, a potent and specific inhibitor of Na+/H+ exchanger activity, significantly inhibits the Nef internalization into M2-macrophages, indicating that Nef is imported by Na+/H+ exchanger (solute carrier family 9, subfamily A). HIV-1 Vpr-induced downregulation of sodium hydrogen exchanger, isoform 1 (NHE1), in Vpr(+) virus infected cells leads to acidification of cells, loss of ezrin, radixin and…				x	x																PMID: 24874739 PMID: 17349711
Q86WC4 _ OSTM1		Up	Osteopetrosis-associated transmembrane protein 1	Required for osteoclast and melanocyte maturation and function.	-																					-
Q96MG7 _ NDNL2		Up	Non-structural maintenance of chromosomes element 3 homolog	Component of the SMC5-SMC6 complex, a complex involved in repair of DNA double-strand breaks by homologous recombination (PubMed:20864041, PubMed:27427983).	-																					-
R4GMX3 _ COMMD3-BMI1;BMI1	BMI1	Up	COMMD3-BMI1 readthrough	metal ion bonding	-																					-
H0Y8X4 _ DNPH1		Up	2'-deoxynucleoside 5'-phosphate N-hydrolase 1	deoxyribonucleoside 5'-monophosphate N-glycosidase activity, deoxyribonucleoside monophosphate catabolic process, nucleotide metabolic process	-																					-
H0YN26 _ ANP32A		Up	Acidic leucine-rich nuclear phosphoprotein 32 family member A		The interaction of Rev with ANP32A is decreased by the presence of RRE						x															PMID: 22174317
Q01105-2 _ SET	SETSIP	Up	Protein SET	Multitasking protein, involved in apoptosis, transcription, nucleosome assembly and histone chaperoning. Isoform 2 anti-apoptotic activity is mediated by inhibition of the GZMA-activated DNase, NME1. In the course of cytotoxic T-lymphocyte (CTL)-induced apoptosis, GZMA cleaves SET, disrupting its binding to NME1 and releasing NME1 inhibition. Isoform 1 and isoform 2 are potent inhibitors of prote…	HIV-1 Rev interacting protein, SET nuclear oncogene, is identified by the in-vitro binding experiments involving cytosolic or nuclear extracts from HeLa cells. The interaction of Rev with SET is decreased by RRE						x															PMID: 22174317
Q01658 _ DR1		Up	Protein Dr1	The association of the DR1/DRAP1 heterodimer with TBP results in a functional repression of both activated and basal transcription of class II genes. This interaction precludes the formation of a transcription-competent complex by inhibiting the association of TFIIA and/or TFIIB with TBP. Can bind to DNA on its own. Component of the ATAC complex, a complex with histone acetyltransferase activity …	Interaction of HIV-1 Tat with TBP/TFIID competes with negative cofactor Dr1 interaction with TBP, thereby inhibiting Dr1							X														PMID: 8764062
Q14061 _ COX17		Up	Cytochrome c oxidase copper chaperone	Copper metallochaperone essential for the assembly of the mitochondrial respiratory chain complex IV (CIV), also known as cytochrome c oxidase. Binds two copper ions and delivers them to the metallochaperone SCO1 which transports the copper ions to the Cu(A) site on the cytochrome c oxidase subunit II (MT-CO2/COX2).	-																					-
Q92947-2 _ GCDH		Up	Glutaryl-CoA dehydrogenase, mitochondrial	Catalyzes the oxidative decarboxylation of glutaryl-CoA to crotonyl-CoA and CO2 in the degradative pathway of L-lysine, L-hydroxylysine, and L-tryptophan metabolism. It uses electron transfer flavoprotein as its electron acceptor.	-																					-
Q96K17 _ BTF3L4		Up	Transcription factor BTF3 homolog 4		-																					-
Q9UBT2 _ UBA2		Up	SUMO-activating enzyme subunit 2	The heterodimer acts as an E1 ligase for SUMO1, SUMO2, SUMO3, and probably SUMO4. It mediates ATP-dependent activation of SUMO proteins followed by formation of a thioester bond between a SUMO protein and a conserved active site cysteine residue on UBA2/SAE2.	-																					-
K7ELJ7 _ CAPNS1		Up	Calpain small subunit 1	calcium ion binding	Activation of the Ca(2+)-dependent protease, calpain, is involved in cytotoxic effects mediated by HIV-1 gp120 in neuroblastoma cultures. Calpain-mediated cleavage of HIV-1 Tat occurs in the C-terminus of this viral protein, between amino acids 68 and 69. The cleavage of Tat by calpain 1 increases neurotoxic effect of this viral protein							x	x													PMID: 17897354 PMID: 24359561
M0R165 _ EPS15L1		Up	Epidermal growth factor receptor substrate 15-like 1	calcium ion binding	-																					-
P16220 _ CREB1		Up	Cyclic AMP-responsive element-binding protein 1	Phosphorylation-dependent transcription factor that stimulates transcription upon binding to the DNA cAMP response element (CRE), a sequence present in many viral and cellular promoters. Transcription activation is enhanced by the TORC coactivators which act independently of Ser-119 phosphorylation. Involved in different cellular processes including the synchronization of circadian rhythmicity an…	The function and activity of CREB is required for both Tat-induced Rho signaling and nuclear targeting of ZO-1. The RNA and protein levels of cAMP responsive element binding protein (CREB) decreases in Vpr-treated human neurons compared to the untreated control. HIV-1 MA increases phosphorylation and the DNA-binding activity of CREB and c-Myc through activation of the cAMP/PKA and MEK/ERK signali…				X			X	X					X								PMID: 22219277 PMID: 24489003 PMID: 20402410
P51858 _ HDGF		Up	Hepatoma-derived growth factor	actin binding, DNA-binding transcription repressor activity, RNA polymerase II-specific, double-stranded DNA binding, growth factor activity, transcription corepressor activity	A stable-isotope labeling by amino acids in cell culture coupled with mass spectrometry-based proteomics identifies downregulation of hepatoma-derived growth factor (HDGF) expression by HIV-1 Vpr in Vpr transduced macrophages				X																	PMID: 23874603
Q8IU81 _ IRF2BP1		Up	Interferon regulatory factor 2-binding protein 1	Acts as a transcriptional corepressor in a IRF2-dependent manner; this repression is not mediated by histone deacetylase activities. May act as an E3 ligase towards JDP2, enhancing its polyubiquitination. Represses ATF2-dependent transcriptional activation.	-																					-
Q8N3X1 _ FNBP4		Up	Formin-binding protein 4		-																					-
Q8NE01-2 _ CNNM3		Up	Metal transporter CNNM3	Probable metal transporter	-																					-
Q92982 _ NINJ1		Up	Ninjurin-1	Involved in the progression of the inflammatory stress by promoting cell-to-cell interactions between immune cells and endothelial cells (PubMed:22162058), Promotes the migration of monocytes across the brain endothelium to central nervous system inflammatory lesions (PubMed:22162058). Acts as a regulator of Toll-like receptor 4 (TLR4) signaling triggered by lipopolysaccharide (LPS) during system…	-																					-
Q96PE1-2 _ GPR124;ADGRA2	ADGRA2	Up	Adhesion G protein-coupled receptor A2	Endothelial receptor which functions together with RECK to enable brain endothelial cells to selectively respond to Wnt7 signals (WNT7A or WNT7B) (PubMed:28289266, PubMed:30026314).	-																					-
Q9BVC5 _ C2orf49		Up	Ashwin	tRNA splicing, via endonucleolytic cleavage and ligation	HIV-1 Rev interacting protein, chromosome 2 open reading frame 49, is identified by the in-vitro binding experiments involving cytosolic or nuclear extracts from HeLa cells. Positional proteomics analysis identifies the cleavage of human chromosome 2 open reading frame 49 (C2orf49; Ashwin) at amino acid residues 29-30 by the HIV-1 protease						X						X									PMID: 22174317 PMID: 22944692
Q9GZU7-2 _ CTDSP1		Up	Carboxy-terminal domain RNA polymerase II polypeptide A small phosphatase 1	Preferentially catalyzes the dephosphorylation of 'Ser-5' within the tandem 7 residue repeats in the C-terminal domain (CTD) of the largest RNA polymerase II subunit POLR2A. Negatively regulates RNA polymerase II transcription, possibly by controlling the transition from initiation/capping to processive transcript elongation. Recruited by REST to neuronal genes that contain RE-1 elements, leading…	-																					-
Q9Y5K6 _ CD2AP		Up	CD2-associated protein	Seems to act as an adapter protein between membrane proteins and the actin cytoskeleton (PubMed:10339567). May play a role in receptor clustering and cytoskeletal polarity in the junction between T-cell and antigen-presenting cell (By similarity).	Cellular biotinylated CD2-associated protein (CD2AP) protein is incorporated into HIV-1 Gag virus-like particles																			X		PMID: 25631074
R4GMR5 _ PSMD8		Up	26S proteasome non-ATPase regulatory subunit 8	proteolysis, Component of the 26S proteasome, a multiprotein complex involved in the ATP-dependent degradation of ubiquitinated proteins. This complex plays a key role in the maintenance of protein homeostasis by removing misfolded or damaged proteins, which could impair cellular functions, and by removing proteins whose functions are no longer required. Therefore, the proteasome participates in …	HIV-1 Tat slightly enhances the activity of the purified 26 S proteasome. HIV-1 Vif binds to the cellular cytidine deaminase APOBEC3G and targets it for degradation through an interaction with the proteasome, thereby inhibiting APOBEC3G mediated restriction of HIV-1 replication. Proteasomal degradation of HIV-1 integrase in mammalian cells occurs by the N-end rule pathway.			X				X				X										PMID: 9079628 PMID: 14614829 PMID: 1089341
Q5T123 _ SH3BGRL3		Up	SH3 domain-binding glutamic acid-rich-like protein 3		-																					-
M0QYF9 _ HOMER3		Up	Homer protein homolog 3	G protein-coupled glutamate receptor binding	-																					-
Q08AG7 _ MZT1		Up	Mitotic-spindle organizing protein 1	Required for gamma-tubulin complex recruitment to the centrosome.	-																					-
Q7L2Z9 _ CENPQ		Up	Centromere protein Q	Component of the CENPA-CAD (nucleosome distal) complex, a complex recruited to centromeres which is involved in assembly of kinetochore proteins, mitotic progression and chromosome segregation. May be involved in incorporation of newly synthesized CENPA into centromeres via its interaction with the CENPA-NAC complex (PubMed:16622420). Plays an important role in chromosome congression and in the r…	-																					-
Q96HN2-2 _ AHCYL2	AHCYL1	Up	Adenosylhomocysteinase 3	May regulate the electrogenic sodium/bicarbonate cotransporter SLC4A4 activity and Mg2+-sensitivity. On the contrary of its homolog AHCYL1, does not regulate ITPR1 sensitivity to inositol 1,4,5-trisphosphate (PubMed:19220705).	HIV-1 Tat modulates IRBIT expression in neuron cells							X														PMID: 24489003
Q9P016 _ THYN1		Up	Thymocyte nuclear protein 1	Specifically binds 5-hydroxymethylcytosine (5hmC), suggesting that it acts as a specific reader of 5hmC. It has NLS motif	-																					-
Q9UKU6 _ TRHDE		Up	Thyrotropin-releasing hormone-degrading ectoenzyme	Specific inactivation of TRH after its release.Release of the N-terminal pyroglutamyl group from pGlu-|-His-Xaa tripeptides and pGlu-|-His-Xaa-Gly tetrapeptides. Cofactor Zn(2+)	-																					-
CON__P13645 _ KRT10		Up
CON__Q29443 _		Up
Q2NMX2 _		Up
Q14146 _ URB2		Down	Unhealthy ribosome biogenesis protein 2 homolog	Essential for hematopietic stem cell development through the regulation of p53/TP53 pathway.	-																					-
Q8TF76 _ GSG2		Down	Serine/threonine-protein kinase haspin	Serine/threonine-protein kinase that phosphorylates histone H3 at 'Thr-3' (H3T3ph) during mitosis. May act through H3T3ph to both position and modulate activation of AURKB and other components of the chromosomal passenger complex (CPC) at centromeres to ensure proper chromatid cohesion, metaphase alignment and normal progression through the cell cycle	-																					-
A0A087X0I0 _ TNXB		Down	Tenascin-X		-																					-
P61626 _ LYZ		Down	Lysozyme C	Lysozymes have primarily a bacteriolytic function; those in tissues and body fluids are associated with the monocyte-macrophage system and enhance the activity of immunoagents.	Tandem affinity purification and mass spectrometry analysis identify lysozyme (LYZ), HIV-1 Gag, Gag/Pol, gp120, and Nef incorporated into staufen1 RNP complexes isolated from HIV-1-expressing cells. HIV-1 Tat downregulates the expression of lysozyme (LYZ) in human primary T cells.					X		X	X											X	X	PMID: 23898208 PMID: 23125841
Q6NW34-2 _ C3orf17		Down	Nucleolus and neural progenitor protein	May play a role in cortex development as part of the Notch signaling pathway. Downstream of Notch may repress the expression of proneural genes and inhibit neuronal differentiation thereby maintaining neural progenitors. May also play a role in preimplentation embryo development.	-																					-
D6RE58 _ SLC35B1		Down	Solute carrier family 35 member B1	transmembrane transport, integral component of membrane	-																					-
F8WAJ0 _ DDX31		Down			-																					-
G3XAN4 _ TRAM1		Down	Translocating chain-associated membrane protein 1	SRP-dependent cotranslational protein targeting to membrane, translocation	-																					-
G4U4J3 _ PAPD5		Down	PAP associated domain containing 5	RNA polyadenylation	-																					-
O75319 _ DUSP11		Down	RNA/RNP complex-1-interacting phosphatase	Possesses RNA 5'-triphosphatase and diphosphatase activities, but displays a poor protein-tyrosine phosphatase activity. In addition, has phosphatase activity with ATP, ADP and O-methylfluorescein phosphate (in vitro). Binds to RNA. May participate in nuclear mRNA metabolism.	-																					-
P33947 _ KDELR2		Down	ER lumen protein-retaining receptor 2	Membrane receptor that binds the K-D-E-L sequence motif in the C-terminal part of endoplasmic reticulum resident proteins and maintains their localization in that compartment by participating to their vesicle-mediated recycling back from the Golgi (PubMed:1325562, PubMed:18086916, PubMed:33053334). Localized in the Golgi in the absence of bound proteins with the sequence motif K-D-E-L. Trafficks …	-																					-
Q15928 _ ZNF141;ZNF732;ZNF679;ZNF735;ZNF519;ZNF479;ZNF595;ZNF257;ZNF66;ZNF718;ZNF716;ZNF486;ZNF506;ZNF729		Down	Zinc finger protein 141	May be involved in transcriptional regulation as a repressor. Plays a role in limb development.	-																					-
Q56NI9 _ ESCO2		Down	N-acetyltransferase ESCO2	Couples the processes of cohesion and DNA replication to ensure that only sister chromatids become paired together. In contrast to the structural cohesins, the deposition and establishment factors are required only during the S phase. Acetylates the cohesin component SMC3 (PubMed:21111234).	-																					-
Q6P4F7 _ ARHGAP11A		Down	Rho GTPase-activating protein 11A	GTPase activator for the Rho-type GTPases by converting them to an inactive GDP-bound state.	-																					-
Q8IV32 _ CCDC71		Down	Coiled-coil domain-containing protein 71		-																					-
Q8NB50 _ ZFP62		Down	Zinc finger protein 62 homolog	May play a role in differentiating skeletal muscle.	-																					-
Q8TDD1 _ DDX54		Down	ATP-dependent RNA helicase DDX54	Has RNA-dependent ATPase activity. Represses the transcriptional activity of nuclear receptors.	-																					-
Q9NVN8 _ GNL3L		Down	Guanine nucleotide-binding protein-like 3-like protein	Stabilizes TERF1 telomeric association by preventing TERF1 recruitment by PML. Stabilizes TERF1 protein by preventing its ubiquitination and hence proteasomal degradation. Does so by interfering with TERF1-binding to FBXO4 E3 ubiquitin-protein ligase. Required for cell proliferation. By stabilizing TRF1 protein during mitosis, promotes metaphase-to-anaphase transition. Stabilizes MDM2 protein by …	-
Q9NY93-2 _ DDX56		Down	Probable ATP-dependent RNA helicase DDX56	May play a role in later stages of the processing of the pre-ribosomal particles leading to mature 60S ribosomal subunits. Has intrinsic ATPase activity.	DDX56 interacts with HIV-1 Rev and enhances the Rev function. DDX56 alters the subcellular localization of Rev from nucleolus to nucleus and co-localizes with Rev in the nucleus						X															PMID: 23608157
A0A0A6YYI3 _ PPAN-P2RY11;PPAN	PPAN	Down	Protein PPAN-P2RY11	rRNA processing	HIV-1 Rev interacting protein, PPAN-P2RY11 read through, is identified by the in-vitro binding experiments involving cytosolic or nuclear extracts from HeLa cells. The interaction of Rev with PPAN-P2RY11 is increased by RRE						X															PMID: 22174317
Q8IYB8 _ SUPV3L1		Down	ATP-dependent RNA helicase SUPV3L1, mitochondrial	Major helicase player in mitochondrial RNA metabolism. Component of the mitochondrial degradosome (mtEXO) complex, that degrades 3' overhang double-stranded RNA with a 3'-to-5' directionality in an ATP-dependent manner. Involved in the degradation of non-coding mitochondrial transcripts (MT-ncRNA) and tRNA-like molecules (PubMed:29967381).	-																					-
Q8TED0 _ UTP15		Down	U3 small nucleolar RNA-associated protein 15 homolog	Ribosome biogenesis factor. Involved in nucleolar processing of pre-18S ribosomal RNA. Required for optimal pre-ribosomal RNA transcription by RNA polymerase I.	Expression of HIV-1 Tat downregulates the abundance of UTP15, U3 small nucleolar ribonucleoprotein (UTP15) in the nucleoli of Jurkat T-cells							X														PMID: 23166591
Q99595 _ TIMM17A		Down	Mitochondrial import inner membrane translocase subunit Tim17-A	Essential component of the TIM23 complex, a complex that mediates the translocation of transit peptide-containing proteins across the mitochondrial inner membrane.	-																					-
Q9BRX9 _ WDR83		Down	WD repeat domain-containing protein 83	Molecular scaffold protein for various multimeric protein complexes. Acts as a module in the assembly of a multicomponent scaffold for the ERK pathway, linking ERK responses to specific agonists. At low concentrations it enhances ERK activation, whereas high concentrations lead to the inhibition of ERK activation. Also involved in response to hypoxia by acting as a negative regulator of HIF1A/HIF…	-																					-
Q9HCG1 _ ZNF160		Down	Zinc finger protein 160	May be involved in transcriptional regulation.	-																					-
Q9Y2P8 _ RCL1		Down	RNA 3'-terminal phosphate cyclase-like protein	Does not have cyclase activity. Plays a role in 40S-ribosomal-subunit biogenesis in the early pre-rRNA processing steps at sites A0, A1 and A2 that are required for proper maturation of the 18S RNA (By similarity).	-																					-
O95625 _ ZBTB11		Down	Zinc finger and BTB domain-containing protein 11	May be involved in transcriptional regulation.	-																					-
Q86YN1 _ DOLPP1		Down	Dolichyldiphosphatase 1	Required for efficient N-glycosylation. Necessary for maintaining optimal levels of dolichol-linked oligosaccharides. Hydrolyzes dolichyl pyrophosphate at a very high rate and dolichyl monophosphate at a much lower rate. Does not act on phosphatidate (By similarity).	-																					-
Q9H0U6 _ MRPL18		Down	39S ribosomal protein L18, mitochondrial	Together with thiosulfate sulfurtransferase (TST), acts as a mitochondrial import factor for the cytosolic 5S rRNA. The precursor form shows RNA chaperone activity; is able to fold the 5S rRNA into an import-competent conformation that is recognized by rhodanese (TST). Both the cytoplasmic and mitochondrial forms are able to bind to the helix IV-loop D in the gamma domain of the 5S rRNA.	-																					-

## Sheet: HIV1 vs CTRL
Accession number_Gene name	Modulation	Protein name (Uniprot)	Function (Source: UniProt)	Interactions with HIV-1 (source: HIV-1 Interactions Database)			Vpu	Vif	Vpr	Nef	Rev	Tat	gp120	gp41	RT	IN	PR	MA	CA	SP1	NC	SP2	P6	Gag	Gag-Pol	PMID
O75558 _ STX11	Up	Syntaxin-11	SNARE that acts to regulate protein transport between late endosomes and the trans-Golgi network	-																						-
P85037 _ FOXK1	Up	Forkhead box protein K1	Transcriptional regulator involved in different processes such as glucose metabolism, aerobic glycolysis, muscle cell differentiation and autophagy . Reduces virus replication, probably by binding the interferon stimulated response element (ISRE) to promote antiviral gene expression (PubMed:25852164). Accumulates in the nucleus upon viral infection (PubMed:25852164).	-																						-
O60346 _ PHLPP1	Down	Myomegalin	-																							-
P61626 _ LYZ	Down	Lysozyme C	Lysozymes have primarily a bacteriolytic function; those in tissues and body fluids are associated with the monocyte-macrophage system and enhance the activity of immunoagents.	Tandem affinity purification and mass spectrometry analysis identify lysozyme (LYZ), HIV-1 Gag, Gag/Pol, gp120, and Nef incorporated into staufen1 RNP complexes isolated from HIV-1-expressing cells. HIV-1 Tat downregulates the expression of lysozyme (LYZ) in human primary T cells.						X		X	X											X	X	PMID: 23898208 PMID: 23125841
Q6NW34-2 _ C3orf17	Down	Nucleolus and neural progenitor protein	May play a role in cortex development as part of the Notch signaling pathway. Downstream of Notch may repress the expression of proneural genes and inhibit neuronal differentiation thereby maintaining neural progenitors. May also play a role in preimplentation embryo development.	-																						-
Q6PGP7 _ TTC37	Down	Tetratricopeptide repeat protein 37	Component of the SKI complex which is thought to be involved in exosome-mediated RNA decay and associates with transcriptionally active genes in a manner dependent on PAF1 complex (PAF1C).	-																						-
Q92771 _ DDX12P	Down	Putative ATP-dependent RNA helicase DDX12	DNA helicase involved in cellular proliferation. Probably required for maintaining the chromosome segregation	-																						-

## Sheet: GS-CA1 vs CTRL
Accession number_Gene name	Modulation	Protein name (Uniprot)	Function (Source: UniProt)	Interactions with HIV-1 (source: HIV-1 Interactions Database)			Vpu	Vif	Vpr	Nef	Rev	Tat	gp120	gp41	RT	IN	PR	MA	CA	SP1	NC	SP2	P6	Gag	Gag-Pol	PMID
A0A2U3TZN1 _ SRP19	Down	Signal recognition particle 19 kDa protein	signal recognition particle, endoplasmic reticulum targeting, 7S RNA binding	Overexpression of SRP19 reduces the HIV-1 NC-mediated packaging of 7SL RNA and A3G into virions in a dose-dependent manner																	X					PMID: 17881443
